# Supplementary material
Source: publisher site journal article supplement (https://www.dovepress.com/article/426485)
Supplement: Supplementary file 1 [file get_supplementary_file.php]

**Supplementary Table 1. Patient Information**

| **Source Types** | **Claims Databases** | | | | | | | **Electronic Health Records** | | | | | | **Others** | |
| --- | --- | --- | --- | --- | --- | --- | --- | --- | --- | --- | --- | --- | --- | --- | --- |
| **Components** | **NHIRD** | **NHIS-NHID** | **PBS** | **Medicaid** | **Medicare** | **VLHD** | **FinReg** | **CDARS** | **CGRD** | **THIN** | **CPRD** | **ISD** | **PHARMO** | **TWB** | **UKB** |
| Original patient ID |  |  |  |  |  |  |  |  |  |  |  | **∨** |  |  |  |
| Scrambled patient ID | **∨** | **∨** | **∨** | **∨** | **∨** | **∨** | **∨** | **∨** | **∨** | **∨** | **∨** |  | **∨** | **∨** | **∨** |
| Eligibility |  |  |  |  |  |  |  |  |  |  |  |  |  |  |  |
| Eligibility start date | **∨** | **∨∆** |  | **∨** | **∨** | **∨&** | **∨** |  |  | **∨** | **∨** | **∨** | **∨** | **∨** | **∨** |
| Eligibility end date | **∨** | **∨∆** |  | **∨** | **∨** | **∨&** | **∨** |  |  | **∨** | **∨** | **∨** | **∨** |  |  |
| Demographics |  |  |  |  |  |  |  |  |  |  |  |  |  |  |  |
| Sex | **∨** | **∨** | **∨** | **∨** | **∨** | **∨** | **∨** | **∨** | **∨** | **∨** | **∨** | **∨** | **∨** | **∨** | **∨** |
| Age | **∨** | **∨** | **∨** | **∨** | **∨** | **∨** | **∨** | **∨** | **∨** | **∨** | **∨** | **∨** | **∨** | **∨** | **∨** |
| Year of birth | **∨** | **∨** | **∨** | **∨** | **∨** |  | **∨** | **∨** | **∨** | **∨** | **∨** | **∨** | **∨** | **∨** | **∨** |
| Month of birth |  |  |  | **∨** | **∨** |  | **∨** | **∨** | **∨** | **∨** | **∨** | **∨** | **∨** | **∨** | **∨** |
| Date of birth |  |  |  | **∨** | **∨** |  | **∨** | **∨** | **∨** |  |  | **∨** |  | **∨** | **∨*** |
| Race |  |  |  | **∨** | **∨** |  |  | **∨** |  | **∨** | **∨** | **∨** |  |  | **∨** |
| Marital status |  |  |  |  |  | **∨** | **∨** |  |  | **∨** | **∨** | **∨** |  | **∨** | **∨** |
| Education level |  |  |  |  |  |  | **∨** |  |  | **∨** |  |  |  |  | **∨** |
| Socio-economic status | **∨#** | **∨$** |  |  |  |  | **∨** |  |  | **∨** | **∨** | **∨** | **∨** | **∨** | **∨** |
| Type of occupation | **∨¥** |  |  |  |  |  | **∨** |  |  | **∨** |  |  |  | **∨** | **∨** |
| Caregiver information |  |  |  |  |  | **∨** | **∨‡** |  |  | **∨** |  |  | **∨§** |  | **∨** |
| Year of death | **∨‖** | **∨** | **∨** | **∨** | **∨** | **∨** | **∨** | **∨** | **∨** | **∨** | **∨** | **∨** | **∨‖** |  | **∨** |
| Month of death | **∨‖** | **∨** |  | **∨** | **∨** | **∨** | **∨** | **∨** | **∨** | **∨** | **∨** | **∨** | **∨‖** |  | **∨** |
| Date of death | **∨‖** | **∨** |  | **∨** | **∨** | **∨** | **∨** | **∨** | **∨** | **∨** | **∨** | **∨** | **∨‖** |  | **∨** |
| Cause of death | **∨‖** | **∨** |  |  |  | **∨** | **∨** | **∨** | **∨** |  | **∨‖** | **∨** | **∨‖** |  | **∨** |
| Location of Patients |  |  |  |  |  |  |  |  |  |  |  |  |  |  |  |
| Address |  |  |  |  |  |  | **∨*** |  |  |  | **∨†** | **∨** | **∨** |  |  |
| City | **∨** | **∨** |  |  |  | **∨** | **∨** | **∨** |  |  |  | **∨** | **∨** | **∨** |  |
| County | **∨** | **∨** |  | **∨** | **∨** | **∨** | **∨** |  |  | **∨** |  | **∨** | **∨** | **∨** |  |
| State/province |  | **∨** | **∨** | **∨** | **∨** | **∨** | **∨** |  |  |  |  | **∨** | **∨** |  |  |
| Zip code |  | **∨** |  | **∨** | **∨** |  |  |  |  | **∨** |  | **∨** | **∨** |  |  |
| Health information |  |  |  |  |  |  |  |  |  |  |  |  |  |  |  |
| Body weight |  | **∨¶** |  |  |  |  | **∨** | **∨** | **∨** | **∨** | **∨** | **∨@** | **∨§** | **∨** | **∨** |
| Body height |  | **∨¶** |  |  |  |  | **∨** | **∨** | **∨** | **∨** | **∨** | **∨@** | **∨§** | **∨** | **∨** |
| Smoking status |  | **∨¶** |  |  |  |  | **∨** | **∨** | **∨** | **∨** | **∨** |  | **∨§** | **∨** | **∨** |
| Alcohol intake |  | **∨¶** |  |  |  |  | **∨** | **∨** | **∨** | **∨** | **∨** |  | **∨§** | **∨** | **∨** |
| Allergy |  |  |  | **∨¤** |  |  |  | **∨††** |  | **∨** | **∨** |  | **∨**** | **∨** | **∨** |
| * Hidden data. Need specific request and justify.  † Only for region.  # Linkage to other datasets to identify low-income households. In addition, the payroll bracket can be a proxy indicator.  $ Through income level and health insurance type.  ¥ High-level occupation groups.  § Possible linkage to GP database (about 20% of the Dutch population).  ‡ Data on caregiver's allowance can be used as proxy.  ¶ Only those who received the national health examination.  ‖ Possible linkage to death register.  ∆ Compulsory health insurance from birth to death.  & All people living in the state of Victoria are eligible.  @ In some fields.  ¤ Using claims records for specific encounters with relevant diagnoses.  ** Possible linkage to hospitalization database (nationwide), GP database (2.5 million patients).  †† As long as it is coded in ICD-9, however, a lot of the cases are not coded in ICD-9. | | | | | | | | | | | | | | | |

| **Source Type** | **Claims Databases** | | | | | | | **Electronic Health Records** | | | | | | **Others** | |
| --- | --- | --- | --- | --- | --- | --- | --- | --- | --- | --- | --- | --- | --- | --- | --- |
| **Component** | **NHIRD** | **NHIS-NHID** | **PBS** | **Medicaid** | **Medicare** | **VLHD** | **FinReg** | **CDARS** | **CGRD** | **THIN** | **CPRD** | **ISD** | **PHARMO** | **TWB** | **UKB** |
| Visit type | **∨** | **∨** | **∨** | **∨** | **∨** | **∨** |  | **∨** | **∨** | **∨** | **∨** | **∨** | **∨** |  | **∨** |
| Date of visit | **∨** | **∨** | **∨** | **∨** | **∨** | **∨** | **∨** | **∨** | **∨** | **∨** | **∨** | **∨** | **∨** | **∨** | **∨** |
| End date of visit | **∨** | **∨*** | **∨¶** | **∨** | **∨** | **∨** | **∨** | **∨** | **∨** | **∨** | **∨‡** | **∨** | **∨‡** |  | **∨‡** |
| Reasons for visit | **∨§** | **∨†** |  | **∨** |  | **∨** | **∨** | **∨$** | **∨** |  | **∨** | **∨** | **∨** |  |  |
| Reasons for discharge |  | **∨#** |  | **∨** | **∨** | **∨** | **∨** | **∨¥** | **∨** |  | **∨‡** | **∨** | **∨** |  | **∨‡** |
| * By adding number of hospitalized days, if hospitalized  † Diagnoses  # Only the following are available: patients hospitalized, transfer, returned to original medical institution, in-hospital death, discharge, outpatient, end of treatment  $ There is an indicator for primary diagnosis of the hospitalization.  ¥ Reason for discharge can be identified if it is death.  § Based on diagnosis.  ‡ Only for hospitalizations  ¶ These are pharmacy visits only so end date would be the same as visit date. | | | | | | | | | | | | | | | |

**Supplementary Table 2. Healthcare Institute Visit Details**

| **Source Type** | **Claims Databases** | | | | | | | **Electronic Health Records** | | | | | | **Others** | |
| --- | --- | --- | --- | --- | --- | --- | --- | --- | --- | --- | --- | --- | --- | --- | --- |
| **Component** | **NHIRD** | **NHIS-NHID** | **PBS** | **Medicaid** | **Medicare** | **VLHD** | **FinReg** | **CDARS** | **CGRD** | **THIN** | **CPRD** | **ISD** | **PHARMO** | **TWB** | **UKB** |
| Place of service | **∨** | **∨** |  | **∨** | **∨** | **∨** | **∨** | **∨** | **∨** | **∨** |  | **∨** |  |  | **∨** |
| International codes |  |  |  |  |  |  |  |  |  |  |  |  |  |  |  |
| ICD-9 | **∨** |  |  | **∨** | **∨** |  | **∨** | **∨** | **∨** |  |  | **∨** | **∨** |  |  |
| ICD-10 | **∨** | **∨** |  | **∨** | **∨** | **∨** | **∨** | **∨** | **∨** |  |  | **∨** | **∨** |  | **∨** |
| Other |  |  |  | **HPCPS, CPT** | **HPCPS, CPT** |  |  |  |  |  | **∨†** | **OPCS 4** | **ICPC** |  |  |
| Domestic codes |  |  |  | **∨** | **∨** | **DRG** |  | **HAMDCT¥** |  | **READ** |  |  |  |  | **READ§** |
| Mapped to ICD-9 |  |  |  |  |  |  |  | **∨** |  | **∨** |  |  |  | **∨** | **∨** |
| Mapped to ICD-10 |  | **∨#** |  |  |  | **∨** | **∨** |  |  | **∨** |  |  |  | **∨** | **∨** |
| Physician | **∨** | **∨‡** |  |  |  |  |  |  | **∨** | **∨** | **∨** | **∨** |  |  |  |
| Diagnosis start date | **∨** | **∨** |  | **∨** | **∨** |  | **∨** | **∨¶** | **∨** | **∨** | **∨** | **∨** | **∨** | **∨** | **∨** |
| Diagnosis end date | **∨** |  |  | **∨*** | **∨** |  |  | **∨∆** |  |  |  | **∨** |  |  |  |
| Stop reason |  |  |  | **∨*** |  |  |  |  |  |  |  | **∨** |  |  |  |
| * Using investigator-defined diagnostic/service criteria  † Primary care clinical data, referral data, immunization data: Read codes/SNOMED codes. Possible linkage to Hospital Episode Statistics: ICD coding.  # KCD-7 codes based on ICD-10 codes  ¥ It is usually coded in ICD-9 with an extension of 1 or 2 digits for a more specific diagnosis of ICD-9.  § For primary care/GP  ‡ Through specialty department from which the diagnosis was made.  ¶ There is a reference date which is supposedly the diagnosis date.  ∆ The discharge date can be a proxy of diagnosis end date for non-chronic diseases. | | | | | | | | | | | | | | | |

**Supplementary Table 3. Diagnosis Details**

**Supplementary Table 4. Drug Details**

| **Source Type** | **Claims Databases** | | | | | | | **Electronic Health Records** | | | | | | **Others** | |
| --- | --- | --- | --- | --- | --- | --- | --- | --- | --- | --- | --- | --- | --- | --- | --- |
| **Component** | **NHIRD** | **NHIS-NHID** | **PBS** | **Medicaid** | **Medicare** | **VLHD** | **FinReg** | **CDARS** | **CGRD** | **THIN** | **CPRD** | **ISD** | **PHARMO** | **TWB** | **UKB** |
| International codes |  |  |  |  |  |  |  |  |  |  |  |  |  |  |  |
| ATC |  |  | **∨** |  |  | **∨** | **∨** |  |  | **∨** |  |  | **∨** |  |  |
| BNF |  |  |  |  |  |  |  | **∨** |  | **∨** |  | **∨** |  |  | **∨** |
| Others |  |  |  | **FDB ETC** |  |  |  |  |  |  |  |  |  |  |  |
| Domestic codes | **∨@** | **∨** | **∨&** |  | **∨** | **∨** |  | **∨** | **∨** | **∨** | **∨†** |  |  |  |  |
| Mapped to ATC | **∨** | **∨** | **∨** |  | **∨** | **∨** |  |  | **∨** | **∨** |  | **∨** | **∨** |  |  |
| Mapped to RxNorm | **∨** |  |  |  | **∨** |  |  |  |  |  |  |  | **∨** |  |  |
| Place of Service | **∨** | **∨** | **∨** |  | **∨** |  | **∨** | **∨** | **∨** | **∨** |  | **∨** | **∨** |  |  |
| Prescription date | **∨** | **∨** | **∨** |  | **∨** | **∨** | **∨** | **∨** | **∨** | **∨** | **∨** | **∨** | **∨** |  | **∨** |
| Prescriber | **∨** | **∨$** | **∨** | **∨** | **∨** | **∨** | **∨** |  | **∨** | **∨** | **∨** |  | **∨** |  |  |
| Dispensing Pharmacist | **∨** | **∨** | **∨** |  |  |  |  |  |  |  |  | **∨** | **∨** |  |  |
| Dispensing date | **∨** | **∨** | **∨** | **∨** |  | **∨** | **∨** | **∨** | **∨** |  |  | **∨** | **∨** |  |  |
| Drug supplied days | **∨** | **∨** |  | **∨** | **∨** |  |  | **∨** | **∨** | **∨** | **∨¥** | **∨** | **∨¥** |  | **∨§** |
| Quantity | **∨** | **∨** | **∨** | **∨** | **∨** | **∨** | **∨** | **∨** | **∨** | **∨** | **∨** | **∨** | **∨** |  | **∨§** |
| Route | **∨** | **∨** | **∨** | **∨** | **∨** | **∨** | **∨** | **∨** | **∨** | **∨** | **∨** | **∨** | **∨** |  |  |
| Dose strength | **∨** | **∨** | **∨** | **∨#** | **∨** | **∨** | **∨** | **∨** | **∨** | **∨** | **∨** | **∨** | **∨** |  | **∨§** |
| Usage frequency | **∨§** | **∨** | **∨** |  |  |  | **∨‡** | **∨** | **∨** | **∨** | **∨** | **∨** | **∨** |  | **∨§** |
| Indication |  |  |  |  |  | **∨¶** |  |  |  |  |  | **∨** |  |  |  |
| Stopped reason |  |  |  |  |  |  |  |  |  |  |  |  |  |  |  |
| Refill number | **∨** | **∨‖** |  | **∨** |  | **∨** | **∨** | **∨** |  | **∨∆** | **∨** | **∨** | **∨** |  |  |
| Lot number |  |  |  |  |  | **∨** |  |  |  |  |  |  | **∨** |  |  |
| † CPRD uses their own product codes, which can be mapped to these British National Formulary (BNF) codes.  # Using external national drug code data  $ Based on specialist department from which the prescription was made.  ¥ Calculated based on quantity and frequency of use  § Free text  ‡ Full-text dosing instructions recorded in the newer data (since 2017), but not directly available  ¶ Can be identified in some cases via specific authority codes  ‖ South Korea doesn’t have a refill policy. After the end of a prescription, the patients have to revisit their physician for a new prescription.  ∆ Tracked by looking into subsequent prescription records  & PBS item codes  @ The National Health Insurance Drug Codes | | | | | | | | | | | | | | | |

**Supplementary Table 5. Procedure Details**

| **Source Type** | **Claims Databases** | | | | | | | **Electronic Health Records** | | | | | | **Others** | |
| --- | --- | --- | --- | --- | --- | --- | --- | --- | --- | --- | --- | --- | --- | --- | --- |
| **Component** | **NHIRD** | **NHIS-NHID** | **PBS** | **Medicaid** | **Medicare** | **VLHD** | **FinReg** | **CDARS** | **CGRD** | **THIN** | **CPRD** | **ISD** | **PHARMO** | **TWB** | **UKB** |
| International codes |  |  |  |  |  |  |  |  |  |  |  |  |  |  |  |
| ICD-9/10 procedure | **∨** |  |  | **∨** | **∨** | **∨** |  | **∨** |  |  |  | **∨** |  |  |  |
| HCPCS |  |  |  | **∨** | **∨** |  |  |  |  |  |  |  |  |  |  |
| CPT-4 |  |  |  | **∨** | **∨** |  |  |  |  |  |  |  |  |  |  |
| Others |  |  |  |  |  |  | **NOMESCO** |  |  |  | **OPCS 4*** | **OPCS 4** |  |  | **OPCS 4** |
| Domestic codes | **∨** | **∨#** |  |  |  |  |  |  | **∨§** | **READ code** |  | **∨** | **∨** |  |  |
| Mapped to ICD 9 |  |  |  |  |  |  |  |  |  |  |  | **∨** |  |  |  |
| Place of service | **∨** | **∨** |  | **∨** | **∨** |  | **∨** | **∨** | **∨** | **∨$** |  | **∨** | **∨** |  |  |
| Procedure date | **∨** | **∨** |  | **∨** | **∨** | **∨** | **∨** | **∨¥** | **∨** | **∨** | **∨** | **∨** | **∨** |  |  |
| Indication | **∨¶** | **∨¶** |  |  |  | **∨** |  |  |  |  |  | **∨** | **∨** |  |  |
| * Possible linkage to Hospital Episode Statistics (HES)  # Based on three levels. Level 1: Purpose and function. Level 2: Shape, material, size specifications, intended site of use on body, method of use. Level 3: Supplier information (product name, manufacturer, or import/distributor name).  $ In GP clinics only  ¥ The admission date of the hospitalization can be a proxy for the procedure date.  § Hospital procedure codes or National Health Insurance codes  ¶ Judged by the diagnosis at the visit | | | | | | | | | | | | | | | |

**Supplementary Table 6. Laboratory Examination Details**

| **Source Type** | **Claims Databases** | | | | | | | **Electronic Health Records** | | | | | | **Others** | |
| --- | --- | --- | --- | --- | --- | --- | --- | --- | --- | --- | --- | --- | --- | --- | --- |
| **Component** | **NHIRD** | **NHIS-NHID** | **PBS** | **Medicaid** | **Medicare** | **VLHD** | **FinReg** | **CDARS** | **CGRD** | **THIN** | **CPRD** | **ISD** | **PHARMO** | **TWB** | **UKB** |
| Type of test | **∨** | **∨** |  | **∨¶** | **∨¶** | **∨** | **∨** | **∨** | **∨** | **∨** | **∨** | **∨#** | **∨*** | **∨** | **∨** |
| Observation date | **∨** | **∨** |  | **∨** | **∨** | **∨** | **∨** | **∨** |  | **∨** | **∨** |  | **∨** | **∨** | **∨** |
| Observation time |  |  |  |  |  |  | **∨** | **∨** |  |  |  |  |  | **∨** | **∨** |
| Value (number) |  | **∨†** |  |  |  |  | **∨** | **∨** | **∨** | **∨** | **∨** |  | **∨** | **∨** | **∨** |
| Value (string) |  | **∨†** |  |  |  |  | **∨** | **∨** | **∨** | **∨** | **∨** |  | **∨** | **∨** |  |
| * Possible linkage to clinical laboratory database (about 5% of the Dutch population)  † Data available only for those who received the national health examination  # Possible but not routinely  ¶ Only major types for inpatient data are available; Outpatient data may be missing. | | | | | | | | | | | | | | | |

**Supplementary Table 7. Claims Details**

| **Source Type** | **Claims Databases** | | | | | | | **Electronic Health Records** | | | | | | **Others** | |
| --- | --- | --- | --- | --- | --- | --- | --- | --- | --- | --- | --- | --- | --- | --- | --- |
| **Component** | **NHIRD** | **NHIS-NHID** | **PBS** | **Medicaid** | **Medicare** | **VLHD** | **FinReg** | **CDARS** | **CGRD** | **THIN** | **CPRD** | **ISD** | **PHARMO** | **TWB** | **UKB** |
| Paid off copayment | **∨#** | **∨** | **∨‡** |  |  | **∨** | **∨$** |  | **∨** |  |  | **∨†** |  |  |  |
| Paid off coinsurance | **∨#** | **∨** |  |  |  |  |  |  | **∨** |  |  |  |  |  |  |
| Paid deductible |  |  |  |  |  |  |  |  | **∨** |  |  |  |  |  |  |
| Paid by payer | **∨** | **∨** |  |  |  |  |  |  | **∨** |  |  |  |  |  |  |
| Total out of pocket | **∨** | **∨¥** |  |  |  |  |  |  | **∨** |  |  |  |  |  |  |
| Total paid | **∨** | **∨** | **∨‡** | **∨** | **∨** |  |  |  | **∨** |  |  |  |  |  |  |
| Ingredient cost | **∨** | **∨** | **∨‡** |  |  | **∨** |  | **∨** |  |  |  | **∨** | **∨** |  |  |
| Wholesale price |  | **∨** | **∨‡** |  |  |  |  | **∨§** |  |  |  | **∨** | **∨** |  |  |
| Medical device cost |  | **∨** |  |  |  |  |  |  | **∨** |  |  |  |  |  |  |
| † Mapping to mean cost available  # Estimated by regulation of National Health Insurance  $ Public, universal healthcare  ¥ The ceiling for each individual varies from one person to another based on their socio-economic status. Amount exceeding this ceiling is out-of-pocket. However, the NHIS-NHID database doesn’t provide this information for research purposes.  § Acquire some specific drug wholesale price if needed  ‡ This information can be linked externally | | | | | | | | | | | | | | | |

**Supplementary Table 8. Information on Alternative Medicine (AM)**

| **Source Type** | **Claims database** | | | | | | | **Electronic Health Records** | | | | | | **Other** | |
| --- | --- | --- | --- | --- | --- | --- | --- | --- | --- | --- | --- | --- | --- | --- | --- |
| **Component** | **NHIRD** | **NHIS-NHID** | **PBS** | **Medicaid** | **Medicare** | **VLHD** | **FinReg** | **CDARS** | **CGRD** | **THIN** | **CPRD** | **ISD** | **PHARMO** | **TWB** | **UKB** |
| AM is used | **∨** | **∨** |  |  |  |  |  |  | **∨** |  | **∨** |  | **∨** | **∨** |  |
| Recorded in the database | **∨** | **∨** |  |  |  |  |  |  | **∨** |  |  |  | **∨§** | **∨** |  |
| Formula coding system | **∨** | **∨** |  |  |  |  |  |  | **∨** |  |  |  |  |  |  |
| Single drug coding system | **∨** | **∨** |  |  |  |  |  |  | **∨** |  |  |  | **∨** |  |  |
| Prescription place | **∨** | **∨** |  |  |  |  |  |  | **∨** |  |  |  | **∨** |  |  |
| Prescriber | **∨** | **∨** |  |  |  |  |  |  | **∨** |  |  |  | **∨** |  |  |
| Prescription date | **∨** | **∨** |  |  |  |  |  |  | **∨** |  |  |  | **∨** |  |  |
| Dispensing pharmacist | **∨** | **∨** |  |  |  |  |  |  |  |  |  |  | **∨** |  |  |
| Dispensing date | **∨** | **∨†** |  |  |  |  |  |  | **∨** |  |  |  | **∨** |  |  |
| AM supplied days | **∨** | **∨** |  |  |  |  |  |  | **∨** |  |  |  | **∨** |  |  |
| Quantity | **∨** | **∨** |  |  |  |  |  |  | **∨** |  |  |  | **∨** | **∨** |  |
| Route | **∨** | **∨** |  |  |  |  |  |  | **∨** |  |  |  | **∨** |  |  |
| Dose strength | **∨** | **∨** |  |  |  |  |  |  | **∨** |  |  |  | **∨** | **∨** |  |
| Usage frequency | **∨** | **∨** |  |  |  |  |  |  | **∨** |  |  |  | **∨** | **∨** |  |
| Indication | **∨** | **∨#** |  |  |  |  |  |  |  |  |  |  | **∨** |  |  |
| The reason stopped |  |  |  |  |  |  |  |  |  |  |  |  |  |  |  |
| The number of refills | **∨** |  |  |  |  |  |  |  |  |  |  |  | **∨** |  |  |
| † Dispensing date is equal to prescription date  # Proxy indicator: diagnoses  § Limited to those dispensed through pharmacies, e.g., homeopathic medicine, herbs, cannabis etc. | | | | | | | | | | | | | | | |

| **Source Type** | **Claims Databases** | | | | | | | **Electronic Health Records** | | | | | | **Others** | |
| --- | --- | --- | --- | --- | --- | --- | --- | --- | --- | --- | --- | --- | --- | --- | --- |
| **Component** | **NHIRD** | **NHIS-NHID** | **PBS** | **Medicaid** | **Medicare** | **VLHD** | **FinReg** | **CDARS** | **CGRD** | **THIN** | **CPRD** | **ISD** | **PHARMO** | **TWB** | **UKB** |
| Provider ID |  |  |  | **∨*** | **∨** |  | **∨** | **∨** | **∨** |  |  | **∨** |  |  |  |
| Scrambled ID | **∨** | **∨** |  |  |  |  |  |  |  |  | **∨** |  | **∨** |  |  |
| Level of hospital | **∨** | **∨** |  | **∨** | **∨** |  | **∨** | **∨** | **∨** |  | **∨†** | **∨** | **∨** |  |  |
| Location of Hospital |  |  |  | **∨** | **∨** |  |  |  | **∨** |  |  | **∨** |  |  |  |
| Address |  |  |  | **∨** | **∨** |  |  | **∨** | **∨** |  |  | **∨** |  |  |  |
| City | **∨** | **∨** |  | **∨** | **∨** | **∨** |  | **∨** | **∨** |  |  | **∨** |  |  |  |
| County | **∨** | **∨** |  | **∨** | **∨** | **∨** |  |  | **∨** |  |  | **∨** |  |  |  |
| State/province |  | **∨** |  | **∨** | **∨** | **∨** |  |  | **∨** |  |  | **∨** |  |  |  |
| Zip code |  | **∨** |  | **∨** | **∨** |  |  |  | **∨** |  |  | **∨** |  |  |  |
| Specialist | **∨** | **∨** |  | **∨** | **∨** |  |  | **∨** | **∨** |  | **∨** | **∨** | **∨** |  |  |
| * Provider ID, but not available for all years  † Possible linkage to Hospital Episode Statistics (HES) | | | | | | | | | | | | | | | |

**Supplementary Table 9. Hospital Details**

**Supplementary Table 10. Physician Details**

| **Source Type** | **Claims Databases** | | | | | | | **Electronic Health Records** | | | | | | **Others** | |
| --- | --- | --- | --- | --- | --- | --- | --- | --- | --- | --- | --- | --- | --- | --- | --- |
| **Component** | **NHIRD** | **NHIS-NHID** | **PBS** | **Medicaid** | **Medicare** | **VLHD** | **FinReg** | **CDARS** | **CGRD** | **THIN** | **CPRD** | **ISD** | **PHARMO** | **TWB** | **UKB** |
| Provider ID |  |  |  | **∨** | **∨** |  |  |  |  |  |  | **∨** |  |  |  |
| Scrambled ID | **∨** |  | **∨** |  |  |  |  |  | **∨** | **∨** | **∨** |  | **∨** |  |  |
| Year of birth | **∨** |  |  |  |  |  |  | **∨** |  |  |  |  | **∨** |  |  |
| Month of birth |  |  |  |  |  |  |  | **∨** |  |  |  |  | **∨** |  |  |
| Date of birth |  |  |  |  |  |  |  | **∨** |  |  |  |  | **∨** |  |  |
| Sex | **∨** |  |  | **∨** | **∨** |  |  | **∨** |  |  | **∨** |  | **∨** |  |  |
| Race |  |  |  | **∨** | **∨** |  |  | **∨** |  |  |  |  |  |  |  |
| Physician specialty | **∨** | **∨** | **∨** | **∨** | **∨** | **∨** |  |  | **∨** |  | **∨** | **∨** | **∨** |  |  |
| Certificate start date | **∨** |  |  | **∨** | **∨** |  |  |  |  |  |  | **∨** | **∨** |  |  |
| Place of service |  | **∨** |  | **∨** | **∨** |  |  | **∨** | **∨** | **∨*** | **∨** | **∨** |  |  |  |
| * All services are provided in GP clinics | | | | | | | | | | | | | | | |

**Supplementary Table 11. Other Health Care Provider Details**

| **Source Type** | **Claims Databases** | | | | | | | **Electronic Health Records** | | | | | | **Others** | |
| --- | --- | --- | --- | --- | --- | --- | --- | --- | --- | --- | --- | --- | --- | --- | --- |
| **Component** | **NHIRD** | **NHIS-NHID** | **PBS** | **Medicaid** | **Medicare** | **VLHD** | **FinReg** | **CDARS** | **CGRD** | **THIN** | **CPRD** | **ISD** | **PHARMO** | **TWB** | **UKB** |
| Type | **∨** |  |  | **∨** | **∨** | **∨** |  |  |  | **∨** | **∨** |  | **∨** |  |  |
| Provider ID |  |  |  | **∨** | **∨** |  |  |  |  |  |  |  | **∨** |  |  |
| Scrambled ID | **∨** |  |  |  |  | **∨** |  |  |  | **∨** | **∨** |  |  |  |  |
| Year of birth | **∨** |  |  |  |  |  |  | **∨** |  |  |  |  |  |  |  |
| Month of birth | **∨** |  |  |  |  |  |  | **∨** |  |  |  |  |  |  |  |
| Date of birth |  |  |  |  |  |  |  | **∨** |  |  |  |  |  |  |  |
| Sex | **∨** |  |  | **∨** | **∨** |  |  | **∨** |  |  | **∨** |  | **∨** |  |  |
| Race |  |  |  | **∨** | **∨** |  |  | **∨** |  |  |  |  |  |  |  |
| Place of service |  | **∨** |  | **∨** | **∨** |  |  | **∨** |  | **∨*** | **∨** |  | **∨** |  |  |
| * All services are provided in GP clinics | | | | | | | | | | | | | | | |
